# Supplementary material for: Genetic diversity and kelp forest vulnerability to climatic stress
Source: PubMed Central journal article supplement (PMC5790012; doi:10.1038/s41598-018-20009-9), 2018-01-30
Supplement: 41598_2018_20009_MOESM1_ESM.pdf [file 41598_2018_20009_MOESM1_ESM.pdf]

1 SUPPORTING INFORMATION

2  
3 **Genetic diversity and kelp forest vulnerability to climatic**  
4 **stress**

5  
6 **Thomas Wernberg<sup>1,†,\*</sup>, Melinda A. Coleman<sup>2,3,†</sup>, Scott Bennett<sup>1,4</sup>, Mads S. Thomsen<sup>1,5</sup>,**  
7 **Fernando Tuya<sup>6</sup>, Brendan P. Kelaher<sup>3</sup>**  
8

9 <sup>1</sup> UWA Oceans Institute (M470) and School of Biological Sciences, University of Western  
10 Australia, Crawley 6009 WA, Australia. [Thomas.wernberg@uwa.edu.au](mailto:Thomas.wernberg@uwa.edu.au)

11 <sup>2</sup> Department of Primary Industries, NSW Fisheries, PO Box 4321, Coffs Harbour NSW 2450,  
12 Australia. [Melinda.coleman@gmail.com](mailto:Melinda.coleman@gmail.com)

13 <sup>3</sup> National Marine Science Centre & Centre for Coastal Biogeochemistry Research, School of  
14 Environment, Science and Engineering, Southern Cross University, PO Box 4321, Coffs  
15 Harbour NSW 2450, Australia. [Brendan.kelaher@scu.edu.au](mailto:Brendan.kelaher@scu.edu.au)

16 <sup>4</sup> Department of Global Change Research, Institut Mediterrani d'Estudis Avançats (Universitat  
17 de les Illes Balears - Consejo Superior de Investigaciones Científicas), Esporles, Spain.  
18 [Sbennett@imedea.uib-csic.es](mailto:Sbennett@imedea.uib-csic.es)

19 <sup>5</sup> Marine Ecology Research Group and Centre for Integrative Ecology, School of Biological  
20 Sciences, University of Canterbury, Private Bag 4800, Christchurch, New Zealand.  
21 [Mads.solgaard.thomsen@gmail.com](mailto:Mads.solgaard.thomsen@gmail.com)

22 <sup>6</sup> IU-ECOQUA, Universidad de Las Palmas de Gran Canaria, 35017 Las Palmas, Canary  
23 Islands, Spain. [Ftuya@yahoo.es](mailto:Ftuya@yahoo.es)

24  
25 † Shared lead authorship.

26  
27 \* **Correspondence:** Thomas Wernberg, UWA Oceans Institute (M470) and School of Biological  
28 Sciences, University of Western Australia, Crawley 6009 WA, Australia.  
29 [thomas.wernberg@uwa.edu.au](mailto:thomas.wernberg@uwa.edu.au), Ph. +61 8 6488 7204.  
30

31 Appendix S1: Statistical results from GLMM

32 Appendix S2: Ocean temperatures during the 2011 marine heat wave

33 Appendix S3: Physical and biological predictor variables

34 Appendix S4 Conceptual models

35 Appendix S5 Additional references

36

37 **Appendix S1: Statistical results from GLMM**

38

39 **Table S1.** Results of linear mixed modelling of the relationships between latitude and genetic  
 40 diversity (expected heterozygosity and number of alleles), physiological versatility (CV of  
 41 quantum efficiency and maximum electron transfer rate), resilience and heat wave impact. Each  
 42 analysis included 'Region' as a random effect to account for any spatial correlation among sites  
 43 within regions. Analyses were undertaken in *nlme* package using R v.3.2.2.  $r^2$  values were  
 44 calculated using the *sem.model.fits* function based on the formulas of Nakagawa and Schielzeth  
 45 (2013).

46

| Fixed effect                   | Marginal $r^2$ | Conditional $r^2$ | t     | P      |
|--------------------------------|----------------|-------------------|-------|--------|
| Expected heterozygosity        | 0.742          | 0.806             | 4.647 | 0.002  |
| Number of alleles              | 0.583          | 0.599             | 3.783 | 0.007  |
| Quantum efficiency             | 0.438          | 0.524             | 2.557 | 0.037  |
| Maximum electron transfer rate | 0.363          | 0.363             | 2.505 | 0.041  |
| Resilience                     | 0.676          | 0.803             | 3.586 | 0.009  |
| HW impact                      | 0.841          | 0.841             | 7.616 | <0.001 |

47

48

49

## 50 Appendix S2: Ocean temperatures during the 2011 marine heat wave

51 Temperature conditions experienced by the 12 kelp forests were derived from blended SST data  
 52 provided by the National Weather Service and the NOAA Operational Model Archive  
 53 Distribution Systems (NOMADS) (Wernberg *et al.* 2013). Monthly mean sea surface  
 54 temperatures, and temperatures for the climatological period 1981-2010, were extracted for four  
 55 regions encompassing the 12 kelp forests from Kalbarri (27.5°S 113.5°E to 28.5°S 114.5°E),  
 56 Jurien Bay (29.5°S 114.5°E to 30.5°S 115.5°E), Perth (31.5°S 115.5°E to 32.5°S 116.5°E) and  
 57 Hamelin Bay (33.5°S 114.5°E to 34.5°S 115.5°E). These SST's closely reflect temperatures at 8  
 58 - 12 m depth on the reefs where the kelps are found (Smale & Wernberg 2009). Moreover,  
 59 bottom temperatures vary <5% between individual reefs within our regions (Smale & Wernberg  
 60 2009).

61 In early 2011 (austral summer), the west coast of Australia experienced an extreme marine heat  
 62 wave driven by an exceptionally strong flow of the Leeuwin Current and high air-sea heat fluxes  
 63 (Feng *et al.* 2013; Wernberg *et al.* 2013). The marine heat wave resulted in ocean temperatures  
 64 warmer than anything in 140-years of records from the Hadley Centre (Wernberg *et al.* 2013)  
 65 and 215 years of records from local coral cores (Zinke *et al.* 2014). In the years immediately  
 66 prior to the heat wave, summer temperatures were within the warmest temperatures generally  
 67 experienced (i.e., below the maximum climatological value), but during the heat wave, temperate  
 68 reefs experienced extended periods of temperatures 2-3 °C higher than normal (Fig. S1).

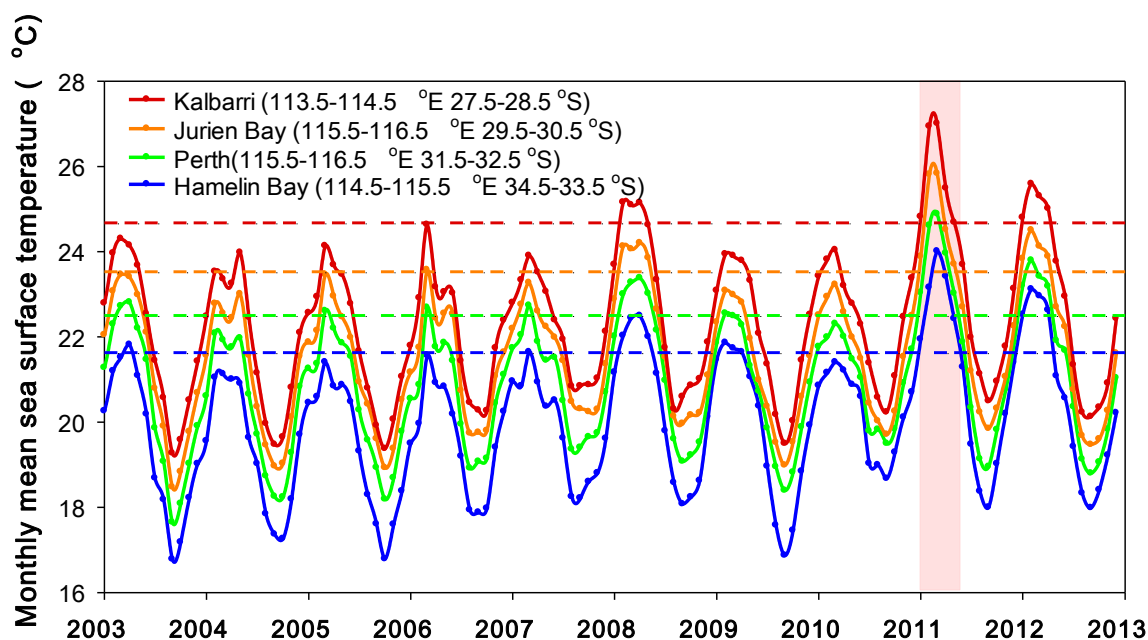

69

70

71 **Fig. S1.** Ocean temperatures from January 2003 to December 2012. Monthly mean SST (solid  
 72 lines) and maximum monthly mean temperatures for the climatological year 1981-2010 (broken  
 73 lines). The five months (January to May 2011) encompassing the 2011 marine heatwave are  
 74 highlighted in pale red.

75

76 The heat wave peaked at slightly different times along the coast but warming profiles were  
 77 similar in different regions (Fig. S1, Fig. S2). The satellites recorded marginally higher warming  
 78 anomalies in Kalbarri (Fig. S2) but the highest absolute temperature anomalies have been  
 79 reported from Jurien Bay (Pearce & Feng 2013), where kelp loss was only partial. Importantly,  
 80 positive climatological maximum anomalies (CMA's) (i.e., conditions where ocean temperatures  
 81 exceeded the climatological maximum temperature) prevailed for ~5 months throughout the  
 82 coastline and there were no statistically significant differences between regions in CMA's over  
 83 the duration of the heatwave (pair-wise t-tests,  $P > 0.213$ , Fig. S2).

84 Climatological maximum anomalies are more conservative, and provide a better measure of  
 85 climatically stressful conditions, than simple temperature anomalies (Selig *et al.* 2010). In  
 86 contrast to temperature anomalies, which provide the deviation from a fixed point in time,  
 87 CMA's take into account that higher temperatures might normally occur at a different time of the  
 88 year. That is, they report deviations from the maximum temperatures normally experienced at  
 89 any time of the year (Selig *et al.* 2010). Here we report monthly CMA's as indicative of  
 90 spatiotemporally broad patterns of heat exposure. Nevertheless, integrating and averaging  
 91 inherently evens out short-term or localized extremes (Smale & Wernberg 2009), which might  
 92 show different patterns that could also be important. Currently, there is a very limited  
 93 understanding of what characteristics of a marine heatwave is detrimental to kelp forests and  
 94 most other marine organisms (Hobday *et al.* 2016). Here we analyse cumulative climatological  
 95 maximum anomalies because cumulative heat exposure (e.g., degree heating weeks) has proven  
 96 to be a strong predictor for coral reefs (Selig *et al.* 2010) and this measure also takes into account  
 97 that a heatwave can exhibit different characteristics in different locations (Hobday *et al.* 2016).

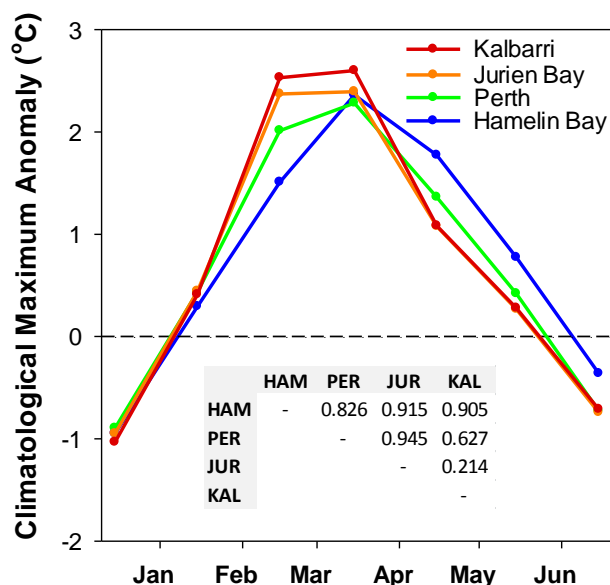

98  
 99 **Fig. S2.** Climatological Maximum Anomalies (CMA's) for the five months encompassing the  
 100 2011-marine heat wave (CMA > 0; highlighted in red in Fig. S1) and two-tailed P-values  
 101 (insert) from pair-wise comparisons of CMA's between all regions for the months January to  
 102 May (CMA > 0).

104 **Appendix S3: Physical and biological predictor variables**

105

106 **Table S2.** *Potential biological and environmental predictors of heatwave impacts. Data and their co-linearity are shown in Fig. S3.*

| Predictor variable     | Data description                                                                                                                                                                                                                                                                                                                                                                                                                                  | Data source                                                        |
|------------------------|---------------------------------------------------------------------------------------------------------------------------------------------------------------------------------------------------------------------------------------------------------------------------------------------------------------------------------------------------------------------------------------------------------------------------------------------------|--------------------------------------------------------------------|
| Genetic diversity      | Expected heterozygosity ( $H_e$ ) derived from 6 polymorphic loci. Raw values used. Values assigned to each kelp forest by linear regression on latitude ( $H_e = 0.0158 \times S^\circ - 0.1643$ ; $r^2 = 0.77$ , $P = 0.0004$ ).                                                                                                                                                                                                                | Coleman <i>et al.</i> (2011)                                       |
| Reef topography        | Counts of large (>2 m vertical relief) topographical features per 25 m transect. Raw values used for each reef.                                                                                                                                                                                                                                                                                                                                   | Tuya <i>et al.</i> (2009)                                          |
| Fish herbivores        | Counts of herbivorous fishes ( <i>Kyphosus</i> spp., <i>Odax</i> spp, <i>Parma</i> spp.) observed in 1500 m <sup>2</sup> transects over one year prior to the 2011 marine heatwave. Raw values used for each reef.                                                                                                                                                                                                                                | Tuya <i>et al.</i> (2011)                                          |
| Heatwave               | Cumulative Climatological Maximum Anomaly. Sum of monthly temperatures exceeding the long-term climatological maximum (1981-2010) for each region (in Fig. S2, the area under each curve above zero). Akin to degrees heating weeks as it reports cumulative heat exposure. Kelp forests within a region were assigned identical CCMA's as short-term logger data has shown reef-to-reef differences to be less than 5% (Smale & Wernberg, 2009). | Appendix S2.                                                       |
| Wave exposure          | Water motion at each kelp forest ranked from 1-12 based on many years of diving in all kelp forests.                                                                                                                                                                                                                                                                                                                                              | Wernberg, unpublished data                                         |
| Turf/foliose seaweeds  | Measurements of cover of small turf and foliose algae cover along 25 m transects. Raw values used for each kelp forest.                                                                                                                                                                                                                                                                                                                           | Wernberg <i>et al.</i> (2011b)                                     |
| Nutrient concentration | Mean NO <sub>x</sub> concentration measured in each kelp forest 3 times over ~1 year. Raw values used.                                                                                                                                                                                                                                                                                                                                            | Wernberg <i>et al.</i> (2010)                                      |
| Depth                  | Measurements with a scuba depth gauge. Raw values used for each kelp forest.                                                                                                                                                                                                                                                                                                                                                                      | Wernberg, unpublished data; see also Wernberg <i>et al.</i> (2010) |

107

108

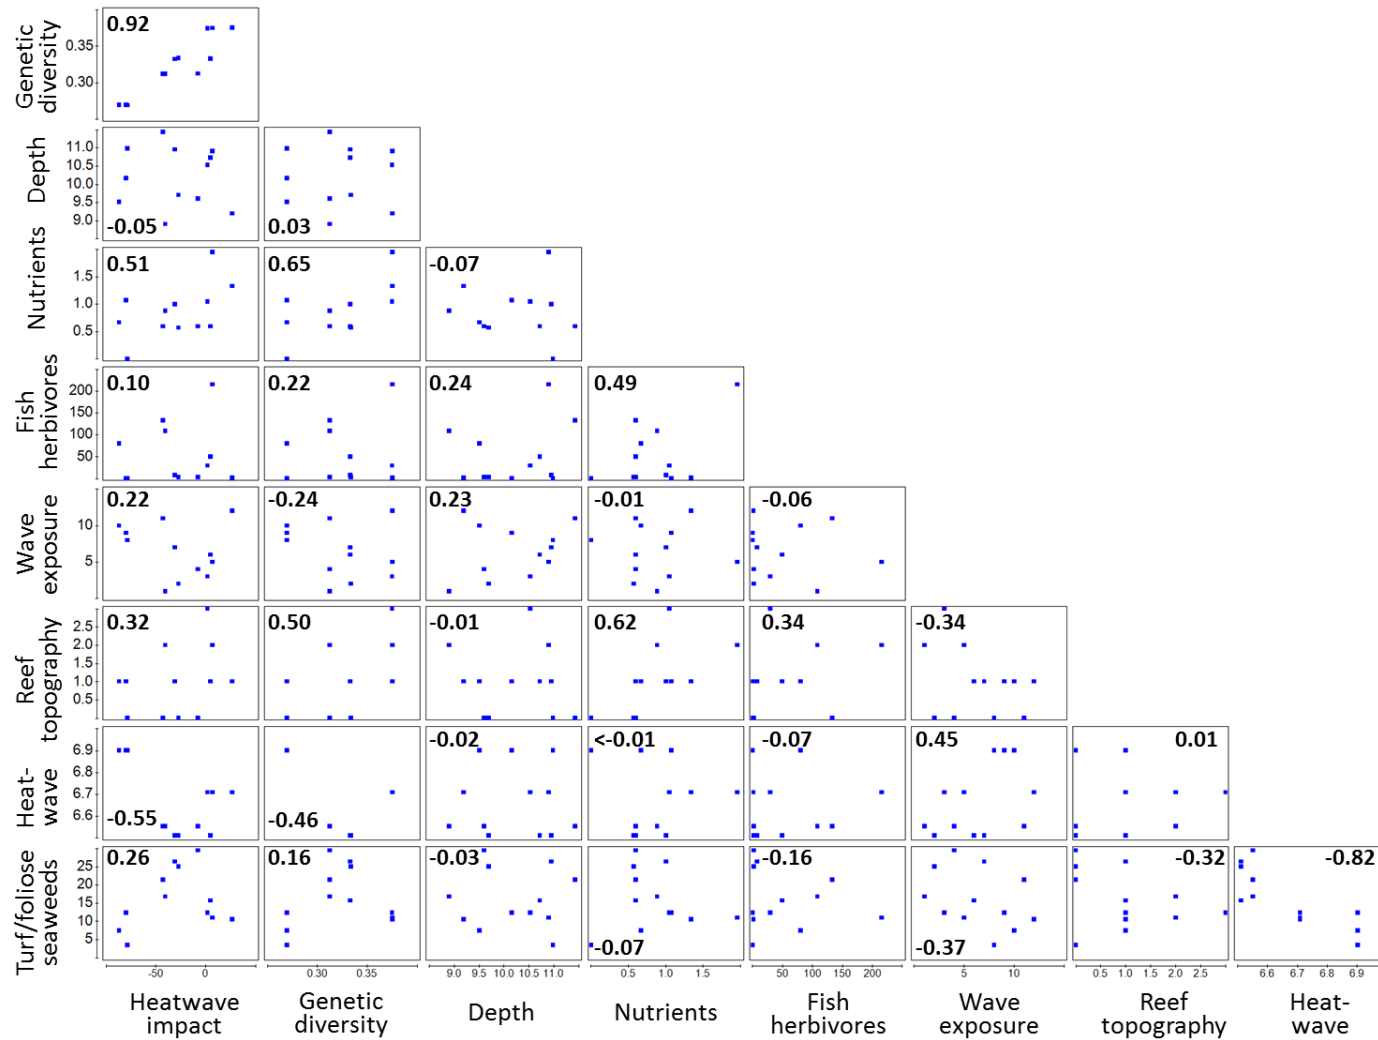

109

110 **Fig. S3.** Draftman's plot of potential biological and environmental predictors of heatwave impacts (dependent variable) (cf. Table S2).  
 111 Insert in each panel are Pearson's correlation coefficients ( $r$ ) between each pair of biological and environmental predictor variables,  
 112 as well as the dependent variable, heatwave impact, indicating their degree of co-linearity. Contributions from individual predictors  
 113 that are highly correlated should be interpreted with caution.

## 114 **Appendix S4 Conceptual models**

115 We speculate that two conceptual models (a 'subset' and an 'selection' model) may explain  
116 possible relationships between genetic diversity and population impacts of perturbations in these  
117 kelp forests (Fig. S4). Both models assume that individual genotypes vary in their stress  
118 tolerance, broadly defined as their capacity to resist and/or recover from a perturbation, and that  
119 their frequency of occurrence in the population follows a Gaussian distribution. Under the  
120 'subset model', genetic diversity arises through non-selective processes (Hampe & Petit, 2005;  
121 Coleman et al., 2011), such that populations with low genetic diversity represent a narrow subset  
122 of genotypes compared to high diversity populations, while the genotypic population mean stress  
123 tolerance remains constant (Fig. S4a, b). Encountering increasingly stressful environmental  
124 conditions, low diversity populations transition from high (due to the absence of vulnerable  
125 genotypes) to low persistence as the environment exceeds the tolerance limits of intermediate  
126 genotypes (Fig. S4b, c). In contrast, diverse populations undergo more gradual decline in  
127 population persistence, due to the presence of both vulnerable and stress-tolerant genotypes.  
128 Under the 'selection model', low genetic diversity arises through selection of stress tolerant  
129 genotypes (Frankham, 2005; Hampe & Petit, 2005), such that genotypic mean population  
130 tolerance increases with loss of diversity (Fig. S4d, e). Consequently, under all but the most  
131 benign or extreme conditions, the 'selection model' predicts greater population resistance to  
132 perturbation and higher persistence of low relative to high diversity populations (Fig. 4f),  
133 whereas the opposite is true for the 'subset model' (Fig. S4c). In both cases, however, the  
134 response of low-diversity populations will be abrupt and catastrophic once the population  
135 threshold is exceeded (Fig. S4c, f).

136

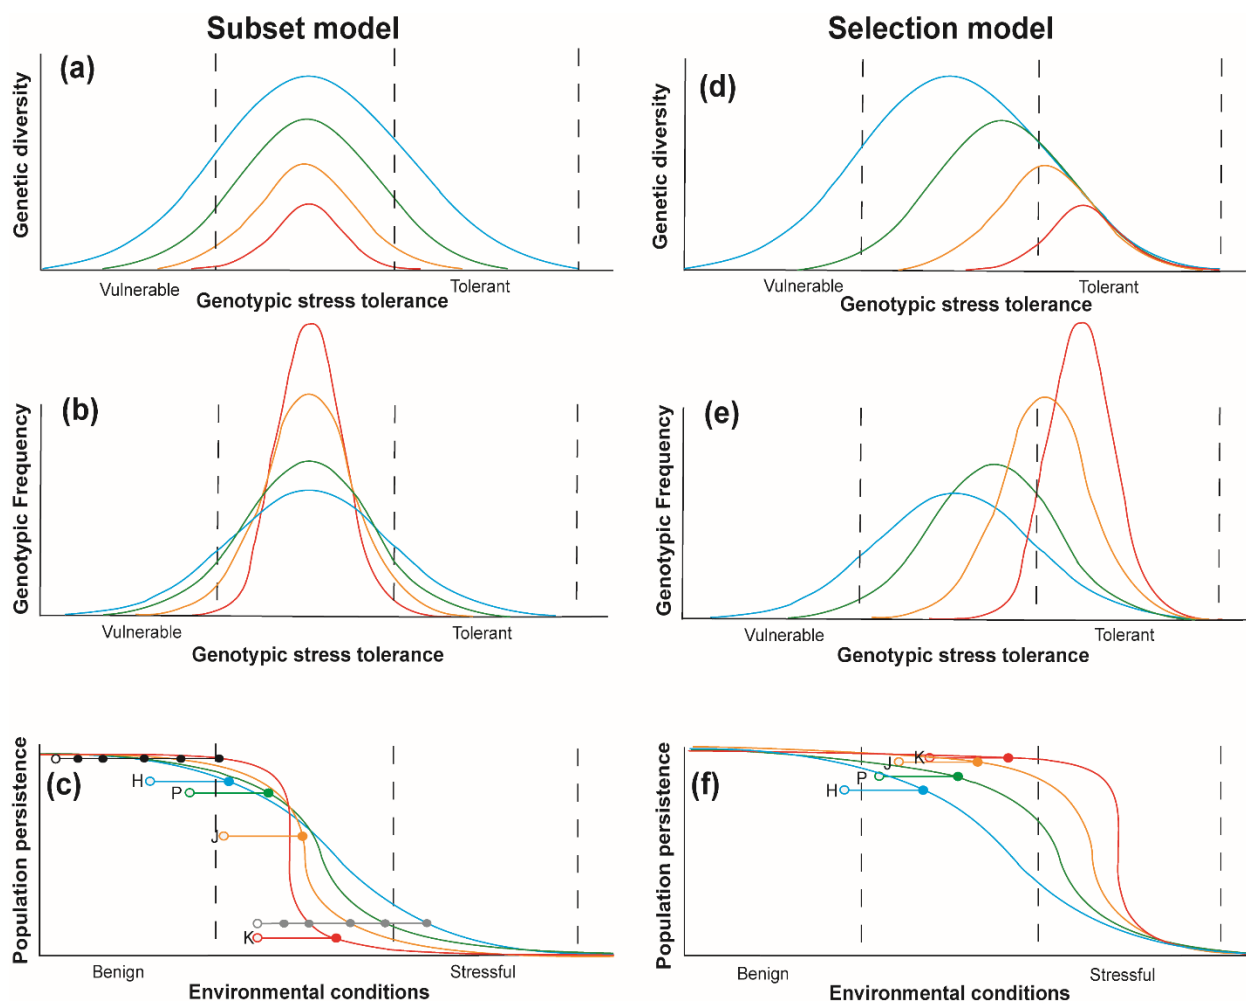

137

138 **Figure S4.** Conceptual models of effects of genetic diversity on population responses to  
 139 perturbation along an environmental gradient. Theoretical distribution of genetic diversity (a,  
 140 d), population genotype frequencies (b, e) and population survival (c, f) under a 'subset' and an  
 141 'selection' origin of genetic diversity. In (c) and (f), different population endpoints (filled circles)  
 142 are illustrated as a function of initial conditions (open circles) and magnitude of perturbation  
 143 (length of the horizontal line). The colored examples (H, P, J, K) illustrate responses at our four  
 144 regions (Hamelin Bay, Perth, Jurien Bay and Kalbarri, respectively), where genetic diversity  
 145 and initial conditions differed (Fig. S1), but the magnitude of perturbation (monthly mean  
 146 thermal stress anomaly) was similar (Fig. S2). The black and grey lines illustrate the general  
 147 cases where variation in initial conditions, anomaly size and genetic diversity have no effect  
 148 (black) or interact to produce complex patterns of influence on population survival (grey).

149

150

151



152 **Appendix S5 Additional references**

153  
154 Feng, M., McPhaden, M.J., Xie, S.-P., and Hafner, J. (2013) La Niña forces unprecedented  
155 Leeuwin Current warming in 2011. *Scientific Reports* 3, 1277

156  
157 Pearce, A.F. and Feng, M. (2013). The rise and fall of the “marine heat wave” off Western  
158 Australia during the summer of 2010/2011. *Journal of Marine Systems*, 111–112, 139–156.

159  
160 Selig, E.R., Casey, K.S., and Bruno, J.F. (2010) New insights into global patterns of ocean  
161 temperature anomalies: implications for coral reef health and management. *Global Ecology and*  
162 *Biogeography* 19, 397-411.

163  
164 Smale, D.A. and Wernberg, T. (2009) Satellite-derived SST data as a proxy for water  
165 temperature in nearshore benthic ecology. *Marine Ecology Progress Series* 387:27-37

166  
167 Tuya, F., Wernberg, T., and Thomsen, M.S. (2011) The relative influence of local to regional  
168 drivers of variation in reef fishes. *Journal of Fish Biology* 79, 217-234.

169  
170 Zinke, J., Rountrey, A., Feng, M., Xie, S.-P., Dissard, D., Rankenburg, K. et al. (2014). Corals  
171 record long-term Leeuwin current variability including Ningaloo Nino/Nina since 1795. *Nature*  
172 *Communications*, 5, 3607.

173  
174
